# Supplementary material for: Examination of the roles and capacities of duty bearers responsible for protecting the human rights to adequate food, nutritional health and wellbeing in Ugandan children’s homes
Source: Springer Nature journal article supplement (doi:10.1186/s12914-018-0156-4), 2018-04-17
Supplement: MOESM3 [file 15703420]

### ADDITIONAL FILE 3

## PROTECTION OF CHILDREN'S RIGHT TO ADEQUATE FOOD, NUTRITIONAL HEALTH AND WELLBEING: A CASE STUDY OF ALTERNATIVE CARE IN SELECTED APPROVED HOMES IN KAMPALA EXTRA REGION, UGANDA

### Structured questionnaire: staff working in children's homes

Name of institution: \_\_\_\_\_  
Day: \_\_\_\_\_ Date: \_\_\_\_\_ Time: \_\_\_\_\_

#### *Personal characteristics*

Respondent name: \_\_\_\_\_ Respondent ID:   
Gender: Female:  Male:   
Position held by respondent: \_\_\_\_\_  
Highest level of completed education: Primary:  Secondary:  Tertiary:   
Education relevant for your current position: \_\_\_\_\_  
Earlier relevant positions: \_\_\_\_\_  
How long have you had your current position:  years

#### *Self-administrated structured questionnaire: role and capacity analysis*

##### *Capacity: motivation, commitment and acceptance of duty*

Human rights principle: general knowledge and awareness of human rights and personal duties ("rule of law")

| 1. Are you satisfied with the following in the children's home:  | Yes                      | No                       | Don't know               |
|------------------------------------------------------------------|--------------------------|--------------------------|--------------------------|
| a. The adequacy of food provided to the children?                | <input type="checkbox"/> | <input type="checkbox"/> | <input type="checkbox"/> |
| b. The adequacy of healthcare provided to the children?          | <input type="checkbox"/> | <input type="checkbox"/> | <input type="checkbox"/> |
| c. The adequacy of care and protection provided to the children? | <input type="checkbox"/> | <input type="checkbox"/> | <input type="checkbox"/> |

Comments:

Human rights principle: internalization of basic human rights standards, values and principles, and acceptance of personal obligations ("accountability, respect for the human rights and the rule of law, dignity")

Human rights principle: non-discrimination, equity, equality and human dignity

| 2. Is there any difference between the following in the children's home:               | Yes                      | No                       | Don't know               |
|----------------------------------------------------------------------------------------|--------------------------|--------------------------|--------------------------|
| a. The access and availability of food for the girl and the boy child?                 | <input type="checkbox"/> | <input type="checkbox"/> | <input type="checkbox"/> |
| b. The access to healthcare and nutritional healthcare for the girl and the boy child? | <input type="checkbox"/> | <input type="checkbox"/> | <input type="checkbox"/> |
| c. The level/rate of malnutrition among the girl and the boy child?                    | <input type="checkbox"/> | <input type="checkbox"/> | <input type="checkbox"/> |

Comments:

| 3. Does the children's home have a distinctive focus on the special needs (nutritional, health, care) of the adolescent girls? | Yes                      | No                       | Don't know               |
|--------------------------------------------------------------------------------------------------------------------------------|--------------------------|--------------------------|--------------------------|
| a. Do the children receive any supplementation with micro- and/or macronutrients? <u>If yes:</u>                               | <input type="checkbox"/> | <input type="checkbox"/> | <input type="checkbox"/> |
| Is increased energy part of the supplementation?                                                                               | <input type="checkbox"/> | <input type="checkbox"/> | <input type="checkbox"/> |
| Is increased vitamin A part of the supplementation?                                                                            | <input type="checkbox"/> | <input type="checkbox"/> | <input type="checkbox"/> |

|    |                                                                  |  |  |  |
|----|------------------------------------------------------------------|--|--|--|
|    | Is increased iron part of the supplementation?                   |  |  |  |
| b. | Are the adolescent girls receiving routinely health checks?      |  |  |  |
|    | With special focus on underweight?                               |  |  |  |
|    | With special focus on vitamin A deficiency?                      |  |  |  |
|    | With special focus on anemia?                                    |  |  |  |
| c. | Do you consider the adolescent girls to be adequately cared for? |  |  |  |

Human rights principle on children`s rights; society`s internalization of basic human rights standards, values, principles and duties (“accountability, responsibility of leaders and individuals, respect for the human rights and the rule of law, dignity, sustainability”)

Human rights principle of children`s rights; society`s internalization of basic human rights standards, values, principles and duties (“accountability, responsibility of leaders and individuals, respect for the human rights and the rule of law, dignity, sustainability”)

***Capacity: legal, political, social and cultural authority to make decisions and to take action***

Human rights principle: the opportunities, restrictions and/or limitations for self-assertion (exercising influence) (“accountability, responsibility of leaders and individuals, respect for the rule of law”)

***Capacity: availability, access and control over relevant economic, human and organizational resources to enable decision making and action***

***Management of economic resources***

Human rights principle: economic resources of the children`s home (available and accessible to, and control by, relevant staff) (“transparency, accountability, responsibility of leaders and individuals, respect for the rule of law, sustainability”)

|    |                                                                                                                                                                                   |     |    |            |
|----|-----------------------------------------------------------------------------------------------------------------------------------------------------------------------------------|-----|----|------------|
| 4. | Are you satisfied with the sufficiency of financial resources regarding the following in the children`s home:                                                                     | Yes | No | Don`t know |
|    | The budget available for realizing the right to adequate food and nutritional health and wellbeing of the children?                                                               |     |    |            |
|    | The economic resources available to ensure adequate employment of relevant staff?                                                                                                 |     |    |            |
|    | The economic resources available to ensure proper training of all staff in human rights, nutrition, health and care, and management of the orphans and other vulnerable children? |     |    |            |

Comments:

|    |                                                                                                                |     |    |            |
|----|----------------------------------------------------------------------------------------------------------------|-----|----|------------|
| 5. | Are you satisfied with the prioritizing of financial resources regarding the following in the children`s home: | Yes | No | Don`t know |
| a. | The provision of food, health and care for good nutrition to the children?                                     |     |    |            |
| b. | Do you consider the relative share of funds allocated to this area as reasonable?                              |     |    |            |

Comments:

|    |                                                                              |     |    |            |
|----|------------------------------------------------------------------------------|-----|----|------------|
| 6. | Are you satisfied with the adequacy of the following in the children`s home: | Yes | No | Don`t know |
| a. | The extent of transparency in the use of resources?                          |     |    |            |
| b. | The extent of accountability in the use of resources?                        |     |    |            |

Comments:

|    |                                                                                                                |     |    |            |
|----|----------------------------------------------------------------------------------------------------------------|-----|----|------------|
| 7. | In the past 4 weeks, did it happen that the children in the children`s home:                                   | Yes | No | Don`t know |
| a. | Were not able to eat the kinds of food you would have preferred for them to eat, because of lack of resources? |     |    |            |
| b. | Had to eat a limited variety of foods because of lack of resources?                                            |     |    |            |
| c. | Had to eat a smaller meal than they needed because there was not enough food?                                  |     |    |            |
| d. | Had to eat fewer meals in a day because there was not enough food?                                             |     |    |            |
| e. | Went to sleep at night hungry because there was not enough food?                                               |     |    |            |

- |    |                                                                                                                                                                    |  |  |  |
|----|--------------------------------------------------------------------------------------------------------------------------------------------------------------------|--|--|--|
| f. | Went a whole day and night without eating anything at all because there was not enough food?                                                                       |  |  |  |
| g. | In the past 4 weeks, did it happen that there was no food to eat of any kind in the children's home, because of lack of resources?                                 |  |  |  |
| h. | Do you consider the last 4 weeks as representative for the previous 12 months of availability of nutritious foods, for the children living in the children's home? |  |  |  |

Comments:

- |    |                                                                                                                                 | Yes | No | Don't know |
|----|---------------------------------------------------------------------------------------------------------------------------------|-----|----|------------|
| 8. |                                                                                                                                 |     |    |            |
| a. | Is it desirable that the State builds and operates children's homes?                                                            |     |    |            |
| b. | Is it desirable that the State increase the control of children's homes, and limit their operation?                             |     |    |            |
| c. | Does the State have legal obligations to provide food and supplementation for malnourished children living in children's homes? |     |    |            |
| d. | Does the State have moral obligations to provide food and supplementation for malnourished children living in children's homes? |     |    |            |
| e. | Does non-State actors have duties to provide food for children living in children's homes?                                      |     |    |            |

Comments:

### *Management of human resources*

Human rights principle: human resources of the children's home (available and accessible to, and control by, relevant staff) ("transparency, accountability, responsibility of leaders and individuals, respect for the rule of law, sustainability")

- |    |                                                                                                                                                                                                                                                                            | Yes | No | Don't know |
|----|----------------------------------------------------------------------------------------------------------------------------------------------------------------------------------------------------------------------------------------------------------------------------|-----|----|------------|
| 9. | Are you satisfied with the adequacy of the following in the children's home:                                                                                                                                                                                               |     |    |            |
| a. | The skills, experience, devotion, and available time of relevant staff?                                                                                                                                                                                                    |     |    |            |
| b. | The children's home to facilitate an enabling environment, with satisfactory numbers of accountable and empowered staff respecting the human rights and the rule of law and the human dignity of children?                                                                 |     |    |            |
| c. | Relevant staffs' awareness of their own human rights, i.e. as rights holders and citizens, and as employees in the children's home?                                                                                                                                        |     |    |            |
| d. | The level of knowledge and adherence to the Alternative Care Framework, the Approved Home Regulations, the National Strategic Programme Plan of Interventions for Orphans and Other Vulnerable Children (NSPPI-2) and the Uganda Nutrition Action Plan (UNAP) among staff? |     |    |            |

Comments:

- |     |                                                                                                                             | Yes | No | Don't know |
|-----|-----------------------------------------------------------------------------------------------------------------------------|-----|----|------------|
| 10. | Are there any form of human resource constraints, which may compromise the children's right to food and nutritional health? |     |    |            |

Comments:

### *Management of organizational resources*

Human rights principle: organizational resources of the children's home (available and accessible to, and control by, relevant staff) ("transparency, accountability, responsibility of leaders and individuals, respect for the rule of law, sustainability")

11. How often are capacity building activities undertaken in the children's home?  
 Monthly:  Quarterly:  Biannual:  Annual:  Never:  Don't know:

Comments:

- |     |                                                                            | Yes | No | Don't know |
|-----|----------------------------------------------------------------------------|-----|----|------------|
| 12. | Have the following issues been on the agenda, and been adequately covered: |     |    |            |
| a.  | Human rights of children:                                                  |     |    |            |



---

empowerment”)

---

17.

- Do State actors regularly interact with the children living here?
- Does all staff regularly interact with the children living here?
- Have State actors explored if the children living here are aware of their right to adequate food to obtain good nutritional health and wellbeing?

Yes No Don't know

| Yes | No | Don't know |
|-----|----|------------|
|     |    |            |
|     |    |            |
|     |    |            |

Comments:

---

18. Do you perceive the following as positive for children:

- a. Child empowerment?
- b. Child empowerment, through access to information relevant for their rights to obtain good nutritional health and wellbeing?
- c. Child empowerment, through capacity and awareness-raising in areas relevant for their rights to obtain good nutritional health and wellbeing?
- d. Child empowerment, through the relevant channels to access redress if their rights are abused?
- e. Child empowerment, through the encouragement of participation, freedom of expression, and opportunities for exercising influence on decision making?

Yes No Don't know

| Yes | No | Don't know |
|-----|----|------------|
|     |    |            |
|     |    |            |
|     |    |            |
|     |    |            |
|     |    |            |
|     |    |            |

Comments:

---

19. Do you consider the media coverage and communication in matters regarding children's homes and orphans and other vulnerable children, in relation to their right to adequate food and nutritional health and wellbeing as:

- a. Adequate?
- b. Truthful?

Yes No Don't know

| Yes | No | Don't know |
|-----|----|------------|
|     |    |            |
|     |    |            |

Comments:

---

***Capacity: capabilities for rational decision making and leaning***

---

Human rights principle: capabilities of children's homes for informed and rational decision making and learning from experience (“accountability, responsibility of leaders and individuals, sustainability”)

---

Human rights principle: child freedom of expression and opportunities for exercising influence, through inclusion, involvement and participation in decision making processes concerning the human rights of the child (“child empowerment”)

---

**Thank you very much!**
